# Supplementary material
Source: PubMed Central journal article supplement (PMC5792286)
Supplement: 2017_178723-Disclosures_and_Contributions.pdf [file 2017_178723-Disclosures_and_Contributions.pdf]

Haematologica  
HAEMATOL/2017/178723  
Version 3

MDS1 and EVI1 complex locus MECOM: a novel candidate gene for  
hereditary hematological malignancies

Tim Ripperger, Winfried Hofmann, Jan C. Koch, Katayoon Shirneshan,  
Detlef Haase, Gerald Wulf, Peter R. Issing, Matthias Karnebogen,  
Gunnar Schmidt, Bernd Auber, Brigitte Schlegelberger, Thomas Illig,  
Birgit Zirn, and Doris Steinemann

Disclosures: none

Contributions: TR and WH designed the study and performed the laboratory work and data analyses; JCK, GW, PRI and MK provided clinical data; KS and DH performed cytogenetic analysis; GS and BA supervised whole-exome sequencing; TR wrote the manuscript; BS, TI, BZ and DS supervised the work and critically reviewed and edited the manuscript.
